# Supplementary material for: The risk assessment of relapse among newly enrolled participants in methadone maintenance treatment: A group-LASSO based Bayesian network study
Source: Frontiers journal article supplement (doi:10.3389/fpubh.2022.1032217), 2023-01-17
Supplement: Data_Sheet_1.pdf [file Data_Sheet_1.pdf]

## Supplementary Material

Table S1. The baseline demographic, drug usage and sex behavior characteristics of newly-enrolled MMT participants under the treatment for 6 consecutive months

Table S2. The baseline demographic, drug usage and sex behavior characteristics of newly-enrolled MMT participants under the treatment for 12 consecutive months

Table S3. Coefficients of selected variables using group-lasso regression under different treatment durations

Figure S1. Variables selection using Group-lasso regression for sensitivity analysis.

Table S4. Coefficients of selected variables using group-lasso regression under different treatment durations (replaced “initial daily dose” with “average daily dose”)

Figure S2. The initial model of Bayesian network of factors relating to relapse of newly enrolled MMT participants who have received 6-month treatment

Figure S3. The initial model of Bayesian network of factors relating to relapse of newly enrolled MMT participants who have received 12-month treatment

Figure S4. The Bayesian network of participants who have received 6-month consecutive MMT under the conditions leading to the highest relapse risk of that of 12-month consecutive MMT

Table S5. Conditional probability distribution of continuous treatment days with job, initial daily dose and the time needed to the clinic as parent nodes

Table S6. The conditional probability distribution of continuous treatment days with transportation as parent nodes

Table S7. The model comparison of group-LASSO logistic and Bayesian networks based on different treatment durations

**Table S1.** The baseline demographic, drug usage and sex behavior characteristics of newly-enrolled MMT participants under the treatment for 6 consecutive months

| Variable                    | No. (%)   |            |            | $\chi^2$          | P      |
|-----------------------------|-----------|------------|------------|-------------------|--------|
|                             | Total     | Relapse    |            |                   |        |
|                             |           | No (%)     | Yes (%)    |                   |        |
|                             |           | 614 (67.9) | 289 (32.1) | -                 | -      |
| Demographic Characteristics |           |            |            |                   |        |
| Age (years old)             |           |            |            |                   |        |
| < 30                        | 92 (10.2) | 71(11.6)   | 21(7.3)    | 10.83             | 0.004* |
| 30 - 44                     | 600(66.4) | 417(67.9)  | 183(63.3)  |                   |        |
| >45                         | 211(23.4) | 126(20.5)  | 85(29.4)   |                   |        |
| Sex                         |           |            |            |                   |        |
| Male                        | 814(90.1) | 559(91.0)  | 255 (88.2) | 1.74              | 0.187  |
| Female                      | 89 (9.9)  | 55(9.0)    | 34(11.8)   |                   |        |
| Marital Status              |           |            |            |                   |        |
| Single                      | 389(43.1) | 256(41.7)  | 133(46.0)  | 4.27              | 0.118  |
| Married                     | 421(46.6) | 300(48.9)  | 121(41.9)  |                   |        |
| Divorced or widowed         | 93(10.3)  | 58(9.5)    | 35(12.1)   |                   |        |
| Job                         |           |            |            |                   |        |
| Unemployed                  | 594(65.8) | 398(64.8)  | 196(67.8)  | 5.95              | 0.203  |
| Service industry employee   | 86(9.5)   | 52(8.5)    | 34(11.8)   |                   |        |
| Worker                      | 66(7.3)   | 50(8.1)    | 16(5.5)    |                   |        |
| Farmer                      | 81(9.0)   | 58(9.4)    | 23(8.0)    |                   |        |
| Self-employed and others    | 76(8.4)   | 56(9.1)    | 20(6.9)    |                   |        |
| Living status               |           |            |            |                   |        |
| Living alone                | 109(12.1) | 64(10.5)   | 45(15.6)   | 6.99 <sup>a</sup> | 0.030* |
| With family                 | 782(86.6) | 544(88.6)  | 238(82.4)  |                   |        |
| With friends                | 12(1.3)   | 6(1.0)     | 6(2.1)     |                   |        |
| Source of living expenses   |           |            |            |                   |        |
| Salary                      | 403(44.6) | 280(45.8)  | 122(42.2)  | 2.13              | 0.345  |
| Family members              | 477(52.8) | 309(52.1)  | 157(54.3)  |                   |        |
| Social welfare and others   | 23(2.6)   | 13(2.1)    | 10(3.5)    |                   |        |
| Relationship with family    |           |            |            |                   |        |

|                                              |           |           |           |       |        |
|----------------------------------------------|-----------|-----------|-----------|-------|--------|
| Close                                        | 385(42.6) | 269(43.8) | 116(40.1) | 2.52  | 0.284  |
| Average                                      | 450(49.8) | 304(49.5) | 146(50.5) |       |        |
| Estranged                                    | 68(7.5)   | 41(6.7)   | 27(9.3)   |       |        |
| <b>Currently employed</b>                    |           |           |           |       |        |
| No                                           | 562(62.3) | 382(62.2) | 180(62.3) | 0.00  | 0.984  |
| Yes                                          | 341(37.7) | 232(37.8) | 109(37.7) |       |        |
| <b>Transportation to the clinic</b>          |           |           |           |       |        |
| By walk                                      | 69(7.7)   | 42(6.9)   | 27(9.3)   | 1.87  | 0.599  |
| By public transportation                     | 599(66.3) | 413(67.2) | 186(64.4) |       |        |
| By bike or motorcycle                        | 151(16.8) | 102(16.7) | 49(17.0)  |       |        |
| Self-drive or others                         | 84(9.3)   | 57(9.3)   | 27(9.3)   |       |        |
| <b>Cost on drugs last month (Yuan)</b>       |           |           |           |       |        |
| <100                                         | 125(13.9) | 84(13.7)  | 40(14.2)  | 1.11  | 0.564  |
| 100 -                                        | 513(58.8) | 343(55.9) | 170(58.8) |       |        |
| 300 -                                        | 265(29.3) | 187(30.4) | 78(27.0)  |       |        |
| <b>Time needed to reach the clinic (min)</b> |           |           |           |       |        |
| <10                                          | 24(2.7)   | 13(2.1)   | 11(3.8)   | 12.54 | 0.006* |
| 10 -                                         | 243(26.9) | 149(24.3) | 94(32.5)  |       |        |
| 30 -                                         | 361(40.0) | 247(40.2) | 114(39.4) |       |        |
| 60 -                                         | 275(30.5) | 205(33.4) | 70(24.2)  |       |        |
| <b>Urine test</b>                            |           |           |           |       |        |
| Negative                                     | 36(4.0)   | 23(3.8)   | 13(4.5)   | 0.29  | 0.590  |
| Positive                                     | 867(96.0) | 591(96.2) | 276(95.5) |       |        |
| <b>HIV test</b>                              |           |           |           |       |        |
| Negative                                     | 842(93.2) | 583(95.0) | 259(89.6) | 8.87  | 0.003* |
| Positive                                     | 61(6.8)   | 31(5.1)   | 30(10.4)  |       |        |
| <b>HCV test</b>                              |           |           |           |       |        |
| Negative                                     | 135(15.0) | 94(15.4)  | 41(14.2)  | 0.19  | 0.659  |
| Positive                                     | 768(85.0) | 520(84.6) | 248(85.8) |       |        |
| <b>Drug use behavior</b>                     |           |           |           |       |        |
| <b>Way of taking drugs</b>                   |           |           |           |       |        |
| Snorting or Smoking                          | 189(20.9) | 128(20.8) | 61(21.1)  | 0.65  | 0.722  |
| Injecting                                    | 632(70.0) | 427(69.6) | 205(70.9) |       |        |
| Both                                         | 82(9.1)   | 59(9.6)   | 23(8.0)   |       |        |

|                                                |           |           |           |       |        |
|------------------------------------------------|-----------|-----------|-----------|-------|--------|
| <b>Frequency of daily drug use last month</b>  |           |           |           |       |        |
| <3 times                                       | 348(38.5) | 234(38.1) | 114(39.4) | 1.78  | 0.412  |
| 3- times                                       | 497(55.0) | 336(54.7) | 161(55.7) |       |        |
| 6- times                                       | 58(6.4)   | 44(7.2)   | 14(4.8)   |       |        |
| <b>Injected drugs last month</b>               |           |           |           |       |        |
| No                                             | 188(20.8) | 133(21.7) | 55(19.0)  | 0.83  | 0.364  |
| Yes                                            | 715(79.2) | 481(78.3) | 234(81.0) |       |        |
| <b>Frequency of drug infection last month</b>  |           |           |           |       |        |
| None                                           | 65(7.2)   | 49(8.0)   | 16(5.5)   | 5.45  | 0.236  |
| < 30                                           | 86(9.5)   | 51(8.3)   | 35(12.1)  |       |        |
| 30 -                                           | 91(10.0)  | 64(10.3)  | 27(9.3)   |       |        |
| 60 -                                           | 214(23.8) | 141(23.0) | 73(25.3)  |       |        |
| 90 -                                           | 447(49.5) | 309(50.3) | 138(47.8) |       |        |
| <b>Frequency of syringe sharing last month</b> |           |           |           |       |        |
| None                                           | 720(79.7) | 485(78.9) | 235(81.3) | 4.68  | 0.096* |
| <30 times                                      | 37(4.1)   | 21(3.4)   | 16(5.5)   |       |        |
| ≥30 times                                      | 146(16.2) | 108(17.6) | 38(13.1)  |       |        |
| <b>Duration of drug use (years)</b>            |           |           |           |       |        |
| < 5                                            | 87(9.6)   | 65(10.6)  | 22(7.6)   | 7.55  | 0.056* |
| 5 -                                            | 136(14.5) | 89(14.5)  | 47(16.3)  |       |        |
| 10 -                                           | 493(54.6) | 345(56.4) | 147(50.9) |       |        |
| 20 -                                           | 187(20.8) | 114(18.6) | 73(25.3)  |       |        |
| <b>Age of the initial drug use (years old)</b> |           |           |           |       |        |
| <20                                            | 181(20.1) | 122(19.9) | 59(20.4)  | 3.52  | 0.318  |
| 20 -                                           | 502(55.6) | 345(56.2) | 157(54.3) |       |        |
| 30 -                                           | 188(20.8) | 130(21.1) | 58(20.1)  |       |        |
| 40 -                                           | 32(3.6)   | 17(2.8)   | 15(5.2)   |       |        |
| <b>Initial daily dose (mg)</b>                 |           |           |           |       |        |
| < 30                                           | 92(10.2)  | 58(9.4)   | 34(11.8)  | 5.73  | 0.057* |
| 30 -                                           | 651(72.1) | 435(70.8) | 216(74.7) |       |        |
| 60 -                                           | 160(17.7) | 121(19.7) | 39(13.5)  |       |        |
| <b>Continuous treat days (day)</b>             |           |           |           |       |        |
| <30                                            | 78 (78.7) | 44(7.2)   | 34(11.8)  | 10.34 | 0.016* |

|                                                                 |           |           |           |       |        |
|-----------------------------------------------------------------|-----------|-----------|-----------|-------|--------|
| 30 -                                                            | 55 (6.1)  | 32(5.2)   | 23(8.0)   |       |        |
| 60 -                                                            | 43(4.8)   | 26(4.2)   | 17(5.9)   |       |        |
| 90 -                                                            | 727(80.5) | 512(83.4) | 215(74.4) |       |        |
| <b>Communication with friends who are drug users last month</b> |           |           |           |       |        |
| None                                                            | 234(25.9) | 168(27.4) | 66(22.8)  | 15.80 | 0.001* |
| 4-6 times /month                                                | 296(32.8) | 219(35.7) | 77(26.6)  |       |        |
| 1-6 times/week                                                  | 121(13.4) | 77(12.5)  | 44(15.2)  |       |        |
| More than once/day                                              | 252(27.9) | 150(24.4) | 102(35.3) |       |        |
| <b>Sexual behavior</b>                                          |           |           |           |       |        |
| <b>Had sex behavior ever</b>                                    |           |           |           |       |        |
| No                                                              | 162(17.9) | 120(19.6) | 42(14.5)  | 3.35  | 0.067* |
| Yes                                                             | 741(82.1) | 494(80.4) | 247(85.5) |       |        |
| <b>Numbers of sexual partner during last 3 months</b>           |           |           |           |       |        |
| None                                                            | 303(33.6) | 196(31.9) | 107(37.0) | 10.47 | 0.005* |
| 1                                                               | 540(59.8) | 386(62.9) | 154(53.3) |       |        |
| >1                                                              | 60(6.6)   | 32(5.2)   | 28(9.7)   |       |        |
| <b>Used condom during the last sex behavior</b>                 |           |           |           |       |        |
| No                                                              | 584(64.7) | 384(62.5) | 200(69.2) | 3.82  | 0.051* |
| Yes                                                             | 319(35.3) | 230(37.5) | 89(30.8)  |       |        |

Note: \* $p < 0.1$ ; <sup>a</sup>Fishers' exact test

**Table S2.** The baseline demographic, drug usage and sex behavior characteristics of newly-enrolled MMT participants under the treatment for 12 consecutive months

| Variable                    | No. (%)    |           |            | $\chi^2$          | P      |
|-----------------------------|------------|-----------|------------|-------------------|--------|
|                             | Total      | Relapse   |            |                   |        |
|                             |            | No        | Yes        |                   |        |
|                             |            | 433(61.0) | 277(39.0%) | -                 | -      |
| Demographic Characteristics |            |           |            |                   |        |
| Age (years old)             |            |           |            |                   |        |
| < 30                        | 66(9.3)    | 49(11.3)  | 17(6.1)    | 14.23             | 0.001* |
| 30 -                        | 476(67.0)  | 300(69.3) | 176(63.5)  |                   |        |
| 45 -                        | 168(23.7)  | 84(19.4)  | 84(30.3)   |                   |        |
| Sex                         |            |           |            |                   |        |
| Male                        | 638 (89.9) | 390(90.1) | 248(89.6)  | 0.05              | 0.817  |
| Female                      | 72 (10.1)  | 43(9.9)   | 29(10.4)   |                   |        |
| Marital Status              |            |           |            |                   |        |
| Single                      | 308(43.4)  | 179(41.3) | 129(46.6)  | 4.69              | 0.096* |
| Married                     | 327(46.1)  | 213(49.2) | 114(41.2)  |                   |        |
| Divorced or widowed         | 75(10.6)   | 41(9.5)   | 34(12.3)   |                   |        |
| Job                         |            |           |            |                   |        |
| Unemployed                  | 474(66.8)  | 280(64.7) | 194(70.0)  | 4.99              | 0.288  |
| Service industry employee   | 70(9.9)    | 40(9.2)   | 30(10.8)   |                   |        |
| Worker                      | 53(7.5)    | 36(8.3)   | 17(6.1)    |                   |        |
| Farmer                      | 55(7.7)    | 36(8.3)   | 19(6.9)    |                   |        |
| Self-employed and others    | 58(8.2)    | 41(9.5)   | 17(6.1)    |                   |        |
| Living status               |            |           |            |                   |        |
| Living alone                | 81(11.4)   | 41(9.5)   | 40(14.4)   | 5.36 <sup>a</sup> | 0.069* |
| With family                 | 620(83.8)  | 388(89.6) | 232(83.8)  |                   |        |
| With friends                | 9(1.3)     | 4(0.9)    | 5(1.8)     |                   |        |
| Source of living expenses   |            |           |            |                   |        |
| Salary                      | 315(44.4)  | 196(45.3) | 119(43.0)  | 3.01              | 0.222  |

|                                              |           |           |           |      |        |
|----------------------------------------------|-----------|-----------|-----------|------|--------|
| Family members                               | 378(53.2) | 230(53.1) | 148(53.4) |      |        |
| Social welfare and others                    | 17(2.4)   | 7(1.6)    | 10(3.6)   |      |        |
| <b>Relationship with family</b>              |           |           |           |      |        |
| Close                                        | 293(41.3) | 173(40.0) | 120(43.3) | 3.35 | 0.187  |
| Average                                      | 367(51.7) | 234(54.0) | 133(48.0) |      |        |
| Estranged                                    | 50 (7.0)  | 26(6.0)   | 24(8.7)   |      |        |
| <b>Currently employed</b>                    |           |           |           |      |        |
| No                                           | 447(63.0) | 265(61.2) | 182(65.7) | 1.47 | 0.226  |
| Yes                                          | 263(37.0) | 168(38.8) | 95(34.3)  |      |        |
| <b>Transportation to the clinic</b>          |           |           |           |      |        |
| By walk                                      | 60(8.5)   | 28(6.5)   | 32(11.6)  | 9.57 | 0.023* |
| By public transportation                     | 485(68.3) | 293(67.7) | 192(69.3) |      |        |
| By bike or motorcycle                        | 115(16.2) | 81(18.7)  | 34(12.3)  |      |        |
| Self-drive or others                         | 50(7.0)   | 31(7.2)   | 19(6.9)   |      |        |
| <b>Cost on drugs last month (Yuan)</b>       |           |           |           |      |        |
| < 100                                        | 94(13.2)  | 53(12.2)  | 41(14.8)  | 3.20 | 0.202  |
| 100 -                                        | 403(56.8) | 240(55.4) | 163(58.8) |      |        |
| 300 -                                        | 213(30.0) | 140(32.3) | 71(26.4)  |      |        |
| <b>Time needed to reach the clinic (min)</b> |           |           |           |      |        |
| < 10                                         | 17(2.4)   | 10(2.3)   | 7(2.6)    | 3.23 | 0.357  |
| 10 -                                         | 183(25.8) | 102(23.6) | 81(29.2)  |      |        |
| 30 -                                         | 292(41.1) | 181(41.8) | 111(40.1) |      |        |
| 60 -                                         | 218(30.7) | 140(32.3) | 78(28.2)  |      |        |
| <b>Urine test</b>                            |           |           |           |      |        |
| Negative                                     | 28(3.9)   | 17(3.9)   | 11(4.0)   | 0.00 | 0.976  |
| Positive                                     | 682(96.1) | 416(96.1) | 266(96.0) |      |        |
| <b>HIV test</b>                              |           |           |           |      |        |
| Negative                                     | 664(93.5) | 410(94.7) | 254(91.7) | 2.49 | 0.114  |
| Positive                                     | 46(6.5)   | 23(5.3)   | 23(8.3)   |      |        |
| <b>HCV test</b>                              |           |           |           |      |        |
| Negative                                     | 102(14.4) | 59(13.6)  | 43(15.5)  | 0.49 | 0.482  |
| Positive                                     | 608(85.6) | 374(86.3) | 234(84.5) |      |        |
| <b>Drug use behavior</b>                     |           |           |           |      |        |

|                                                |           |           |           |       |        |
|------------------------------------------------|-----------|-----------|-----------|-------|--------|
| <b>Way of taking drugs</b>                     |           |           |           |       |        |
| Snorting or Smoking                            | 137(19.3) | 81(18.7)  | 56(20.2)  | 0.35  | 0.840  |
| Injecting                                      | 501(70.6) | 309(71.4) | 192(69.3) |       |        |
| Both                                           | 72(10.1)  | 43(9.9)   | 29(10.5)  |       |        |
| <b>Frequency of daily drug use last month</b>  |           |           |           |       |        |
| <3 times                                       | 267(37.6) | 162(37.4) | 105(37.9) | 0.15  | 0.929  |
| 3- times                                       | 391(55.1) | 235(55.0) | 153(55.2) |       |        |
| 6- times                                       | 52(7.3)   | 33(7.6)   | 19(6.9)   |       |        |
| <b>Injected drugs last month</b>               |           |           |           |       |        |
| No                                             | 141(19.9) | 86(19.9)  | 55(19.9)  | 0.00  | 0.998  |
| Yes                                            | 569(80.1) | 347(80.1) | 222(80.1) |       |        |
| <b>Frequency of drug infection last month</b>  |           |           |           |       |        |
| None                                           | 55(7.7)   | 35(8.1)   | 20(7.2)   | 4.98  | 0.289  |
| < 30                                           | 71(10.0)  | 35(8.1)   | 36(13.0)  |       |        |
| 30 -                                           | 72(10.2)  | 46(10.6)  | 26(9.4)   |       |        |
| 60 -                                           | 157(22.1) | 100(23.1) | 57(20.6)  |       |        |
| 90 -                                           | 355(50.0) | 217(50.1) | 138(49.8) |       |        |
| <b>Frequency of syringe sharing last month</b> |           |           |           |       |        |
| None                                           | 718(79.7) | 483(78.9) | 235(81.3) | 4.71  | 0.095* |
| <30 times                                      | 37(4.1)   | 21(3.4)   | 16(5.5)   |       |        |
| ≥30 times                                      | 146(16.2) | 108(17.6) | 38(13.1)  |       |        |
| <b>Duration of drug use (years)</b>            |           |           |           |       |        |
| < 5                                            | 57(86.0)  | 38(8.8)   | 19(6.9)   | 13.19 | 0.004* |
| 5 -                                            | 99(13.9)  | 64(14.8)  | 35(12.6)  |       |        |
| 10 -                                           | 401(56.5) | 257(59.4) | 144(52.0) |       |        |
| 20 -                                           | 154(21.5) | 74(17.1)  | 79(28.5)  |       |        |
| <b>Age of the initial drug use (Years old)</b> |           |           |           |       |        |
| < 20                                           | 145(20.4) | 90(20.81) | 55(19.9)  | 11.33 | 0.010* |
| 20 -                                           | 397(55.9) | 23(55.29) | 158(57.0) |       |        |
| 30 -                                           | 145(20.4) | 97(22.4)  | 48(17.3)  |       |        |



|                                                      |           |           |           |      |        |
|------------------------------------------------------|-----------|-----------|-----------|------|--------|
| 40 -                                                 | 23(3.2)   | 7(1.65)   | 16(5.8)   |      |        |
| <b>Initial daily dose (mg)</b>                       |           |           |           |      |        |
| <30                                                  | 59(8.3)   | 37(8.5)   | 22(7.9)   | 0.56 | 0.755  |
| 30 -                                                 | 517(71.8) | 311(71.8) | 206(74.4) |      |        |
| 60 -                                                 | 134(18.9) | 85(19.6)  | 49(17.7)  |      |        |
| <b>Average daily dose (dose)</b>                     |           |           |           |      |        |
| <30                                                  | 68(9.6)   | 49(11.3)  | 19(6.9)   | 4.21 | 0.122  |
| 30 -                                                 | 377(53.1) | 222(51.3) | 155(56.0) |      |        |
| 60 -                                                 | 265(37.3) | 162(37.4) | 103(37.2) |      |        |
| <b>Continuous treat days (day)</b>                   |           |           |           |      |        |
| <30                                                  | 48(6.8)   | 26(6.0)   | 22(7.9)   | 6.26 | 0.100* |
| 30 -                                                 | 29(4.1)   | 12(2.8)   | 17(6.1)   |      |        |
| 60 -                                                 | 40(5.6)   | 24(5.5)   | 16(5.8)   |      |        |
| 90 -                                                 | 593(83.5) | 371(85.7) | 222(80.1) |      |        |
| <b>Communication with drug friends last month</b>    |           |           |           |      |        |
| None                                                 | 200(28.2) | 122(30.4) | 78(28.2)  | 5.93 | 0.115  |
| 4-6 times /month                                     | 227(32.0) | 151(34.9) | 76(27.4)  |      |        |
| 1-6 times/week                                       | 97(13.7)  | 58(13.4)  | 39(14.1)  |      |        |
| More than once /day                                  | 186(26.2) | 102(23.6) | 84(30.3)  |      |        |
| <b>Sexual behavior</b>                               |           |           |           |      |        |
| <b>Had sex behavior ever</b>                         |           |           |           |      |        |
| No                                                   | 128(18.0) | 78(18.0)  | 50(18.1)  | 0.00 | 0.99   |
| Yes                                                  | 582(82.0) | 355(82.0) | 227(81.9) |      |        |
| <b>Numbers of sexual partner during last 3months</b> |           |           |           |      |        |
| None                                                 | 268(37.7) | 147(33.9) | 121(43.7) | 9.77 | 0.008* |
| 1                                                    | 400(56.3) | 264(61.0) | 136(49.1) |      |        |
| >1                                                   | 42(5.9)   | 22(5.1)   | 20(7.2)   |      |        |
| <b>Used condom during the last sex behavior</b>      |           |           |           |      |        |
| No                                                   | 468(65.9) | 273(63.0) | 195(70.4) | 4.06 | 0.044* |
| Yes                                                  | 242(34.1) | 160(37.0) | 82(29.6)  |      |        |

**Note:** \* $p < 0.10$ ; <sup>a</sup>Fishers' exact test

**Table S3.** Coefficients of selected variables using group-lasso regression under different treatment durations

| Variable                                               | Treatment duration |           |
|--------------------------------------------------------|--------------------|-----------|
|                                                        | 6 months           | 12 months |
| Sex: Female                                            | 0.036              | 0         |
| Age (years old): 30 -                                  | 0.045              | 0.060     |
| Age (years old):45 -                                   | 0.105              | 0.124     |
| Marital Status: Married                                | -0.023             | 0         |
| Marital Status: Divorced or widowed                    | 0.003              | 0         |
| Job: Serviced industry employee                        | 0.045              | 0         |
| Job: Workers                                           | -0.024             | 0         |
| Job: Farmer                                            | -0.036             | 0         |
| Job: Self-employed and others                          | -0.023             | 0         |
| Living status: With friends                            | -0.040             | -0.003    |
| Living status: With family                             | 0.041              | 0.003     |
| Source of living expense: family                       | 0                  | 0         |
| Source of living expense: social welfare and others    | 0                  | 0         |
| Relationship with family: Average                      | 0.001              | 0         |
| Relationship with family: Estranged                    | 0.012              | 0         |
| Age of the initial drug use (years old ):20 -          | -0.023             | 0         |
| Age of the initial drug use (years old):30 -           | -0.044             | -0.033    |
| Age of the initial drug use (years old) :40 -          | 0.038              | 0.077     |
| Transportation to the clinic: by public transportation | 0                  | -0.028    |
| Transportation to the clinic: by bike or motorcycle    | 0                  | -0.050    |
| Transportation to the clinic: by self-drive or others  | 0                  | -0.029    |
| Urine test                                             | 0                  | 0         |
| HIV test                                               | 0.121              | 0.019     |
| HCV test                                               | 0                  | 0         |
| Frequency of daily drug use last month:3 - times       | 0.005              | 0         |
| Frequency of daily drug use last month:6 - times       | -0.025             | 0         |
| Cost on drugs last month: 100 -                        | 0                  | 0         |

|                                                                |         |         |
|----------------------------------------------------------------|---------|---------|
| Cost on drugs last month: 300 -                                | 0       | 0       |
| Frequency of syringe sharing last month: <30 times             | 0.026   | 0       |
| Frequency of syringe sharing last month: $\geq$ 30 times       | -0.027  | 0       |
| Frequency of drug infection last month:< 30 times              | 0.073   | 0       |
| Frequency of drug infection last month: 30 - times             | 0.032   | 0       |
| Frequency of drug infection last month: 60 - times             | 0.053   | 0       |
| Frequency of drug infection last month:< 90 times              | 0.036   | 0       |
| Had sex behavior ever                                          | 0.072   | 0       |
| Numbers of sexual partner during last 3 months: One            | - 0.020 | - 0.033 |
| Numbers of sexual partner during last 3months: >1              | 0.099   | 0.022   |
| Used condom during the last sex Behavior                       | - 0.050 | - 0.008 |
| Communication with drug friends last month: 4 - 6 times/ month | - 0.015 | 0       |
| Communication with drug friends last month: 1 - 6 times/ week  | 0.050   | 0       |
| Communication with drug friends last month: More than once/day | 0.076   | 0       |
| Time needed to reach the clinic (min):10 -                     | - 0.020 | 0       |
| Time needed to reach the clinic (min):30 -                     | - 0.054 | 0       |
| Time needed to reach the clinic (min):60 -                     | -0.086  | 0       |
| Average dose of the first week(mg): 30 -                       | -0.021  | 0       |
| Average dose of the first week(mg): 60 -                       | -0.086  | 0       |
| Continuous treat days: 30 -                                    | 0.004   | 0.028   |
| Continuous treat days: 60 -                                    | -0.011  | -0.011  |
| Continuous treat days: 90 -                                    | -0.104  | -0.018  |

**Figure S1.** Variables selection using Group-lasso regression for sensitivity analysis. (a) and (b) presents the 10-fold cross-validation error of the parameter  $\lambda$  based on the baseline data of newly enrolled MMT participants who received 6-month and 12-month consecutive treatment, respectively. (c) and (d) presents the parameter solution path based on the baseline data of newly enrolled MMT who received 6-month and 12-month consecutive treatment.

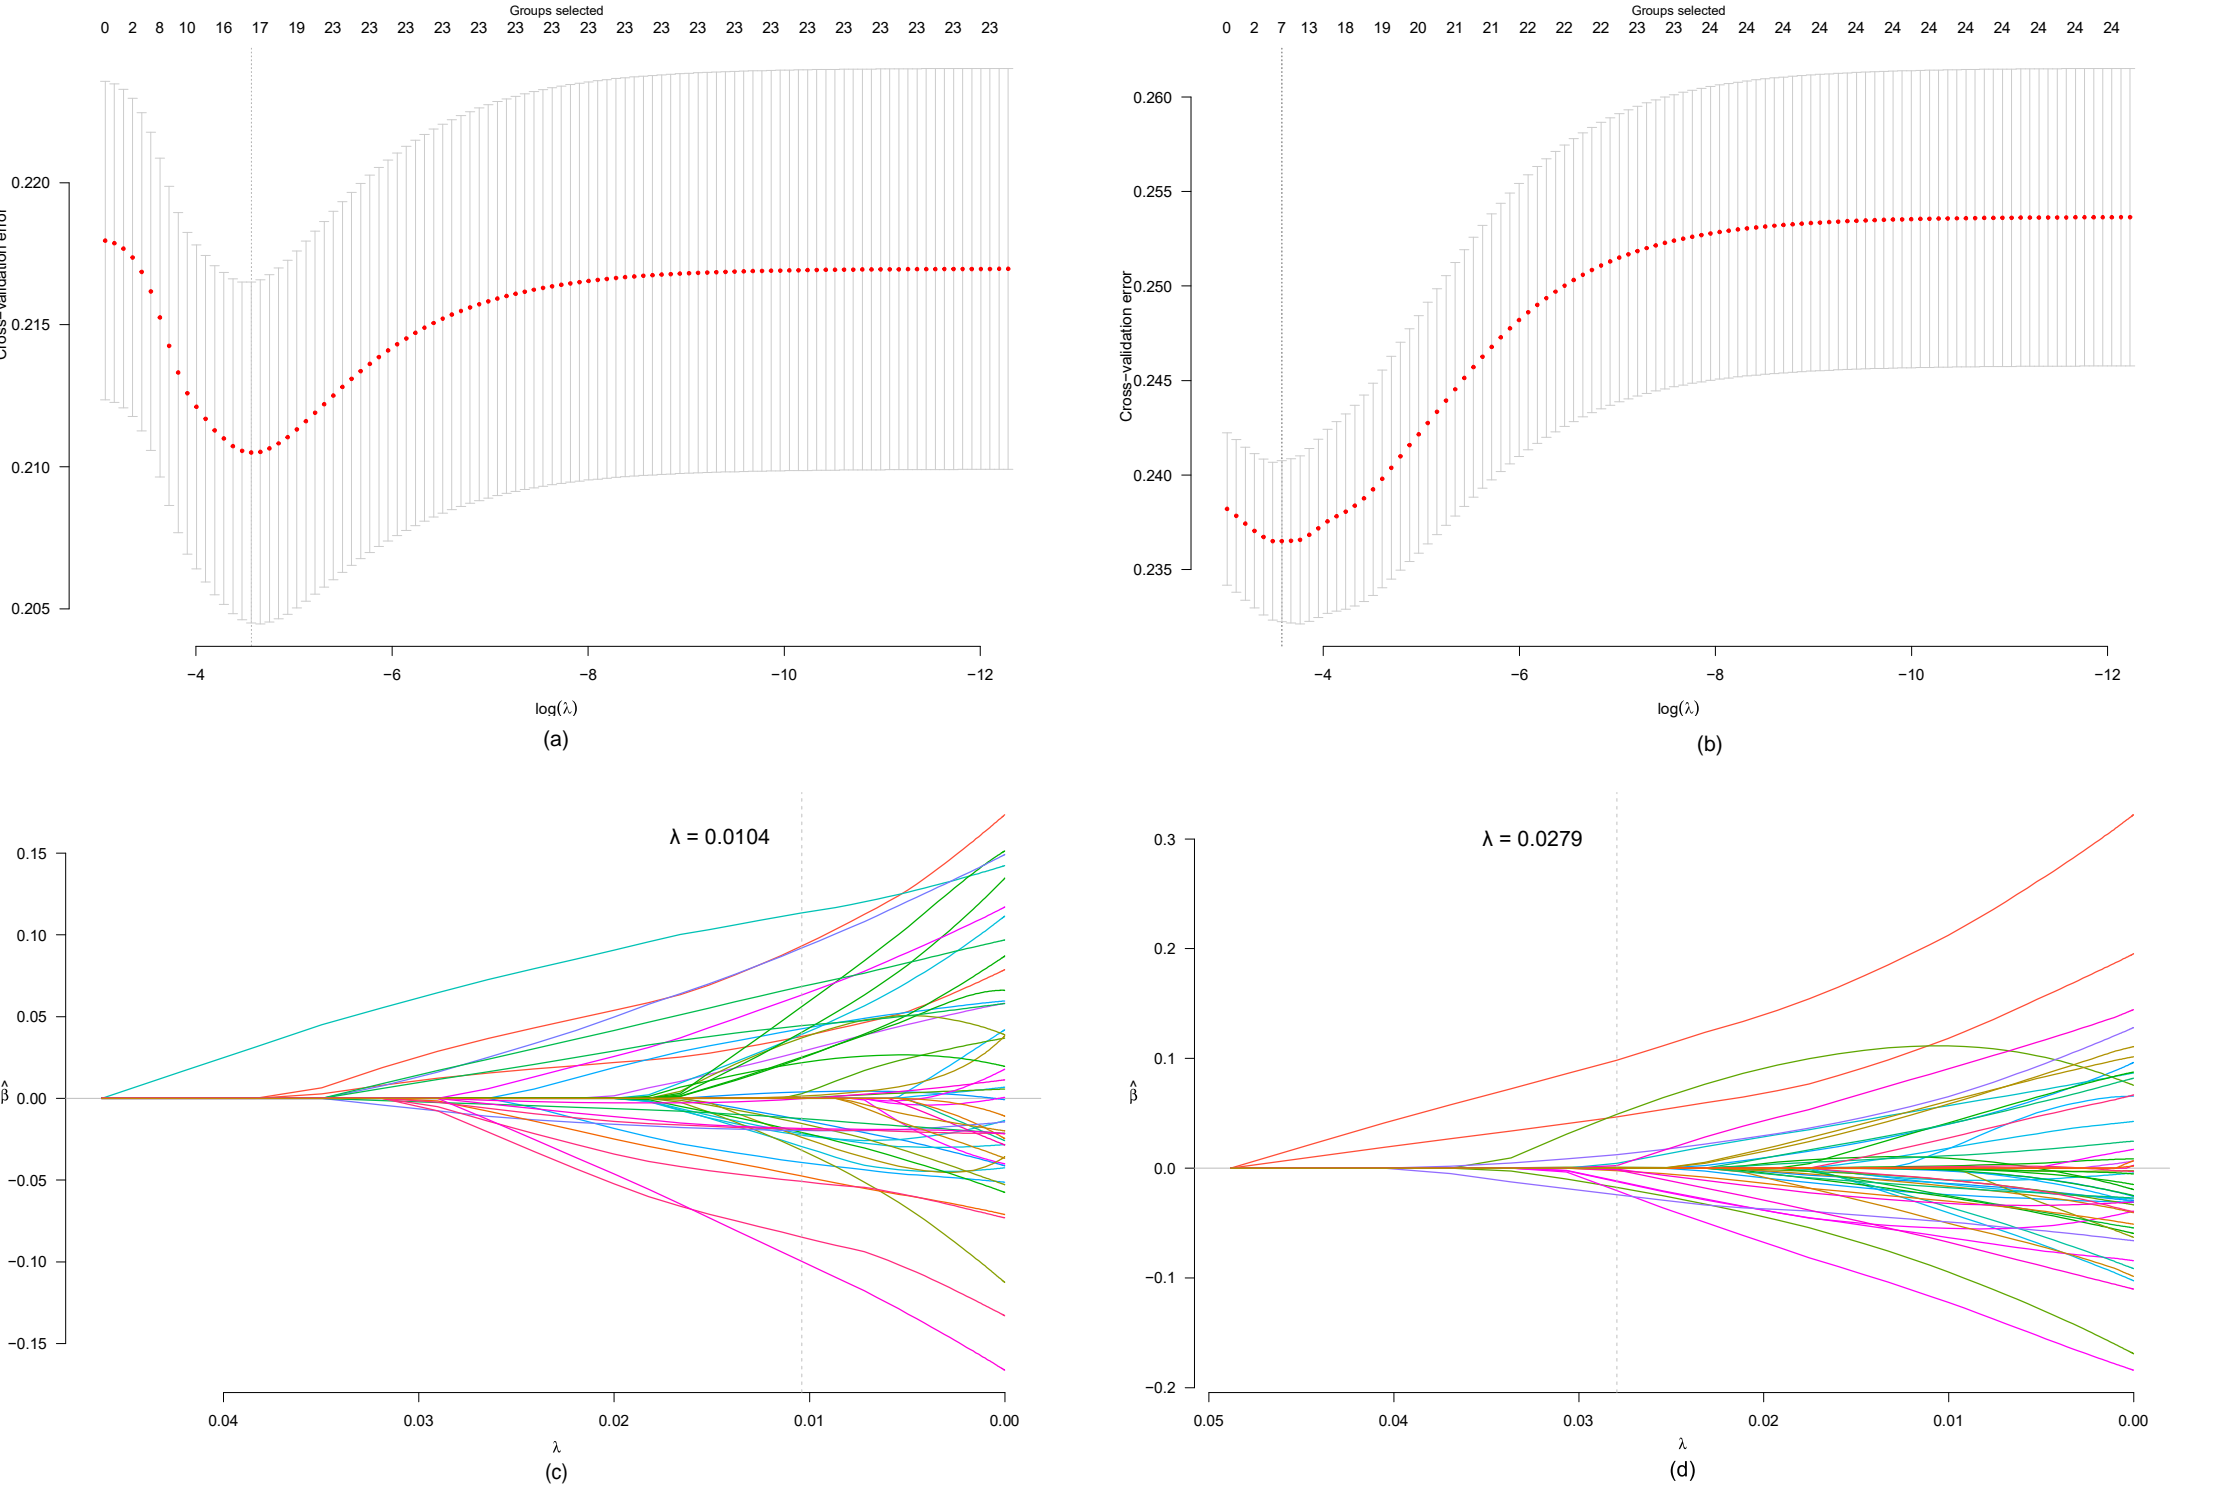

**Table S4.** Coefficients of selected variables using group-lasso regression under different treatment durations (replaced “initial daily dose” with “average daily dose”)

| Variable                                              | Treatment duration |           |
|-------------------------------------------------------|--------------------|-----------|
|                                                       | 6 months           | 12 months |
| Sex: Female                                           | 0.029              | 0         |
| Age (years old): 30 -                                 | 0.038              | 0.047     |
| Age (years old):45 -                                  | 0.093              | 0.098     |
| Marital Status: Married                               | -0.013             | 0         |
| Marital Status: Divorced or widowed                   | 0.004              | 0         |
| Job: Serviced industry employee                       | 0.039              | 0         |
| Job: Workers                                          | -0.023             | 0         |
| Job: Farmer                                           | -0.029             | 0         |
| Job: Self-employed and others                         | -0.022             | 0         |
| Living status: With friends                           | -0.039             | 0         |
| Living status: With family                            | 0.042              | 0         |
| Source of living expense: family                      | 0                  | 0         |
| Source of living expense: social welfare and others   | 0                  | 0         |
| Relationship with family: Average                     | 0.000              | 0         |
| Relationship with family: Estranged                   | 0.003              | 0         |
| Age of the initial drug use (years old):20 -          | -0.015             | 0.001     |
| Age of the initial drug use (years old):30 -          | -0.032             | -0.017    |
| Age of the initial drug use (years old) :40 -         | 0.037              | 0.049     |
| Transportation to the clinic: by public               | 0                  | -0.012    |
| Transportation to the clinic: by bike or motorcycle   | 0                  | -0.021    |
| Transportation to the clinic: by self-drive or others | 0                  | -0.012    |
| Urine test                                            | 0                  | 0         |
| HIV test                                              | 0.113              | 0.004     |
| HCV test                                              | 0                  | 0         |
| Frequency of daily drug use last month:3 - times      | 0.001              | 0         |
| Frequency of daily drug use last month:3 - times      | -0.024             | 0         |
| Cost on drugs last month: 100 -                       | 0                  | 0         |
| Cost on drugs last month: 300 -                       | 0                  | 0         |
| Frequency of syringe sharing last month: <30 times    | 0.022              | 0         |
| Frequency of syringe sharing last month: <30 times    | -0.021             | 0         |
| Frequency of drug infection last month: ≥30 times     | 0.056              | 0         |

|                                                                |        |        |
|----------------------------------------------------------------|--------|--------|
| Frequency of drug infection last month: 30 - times             | 0.024  | 0      |
| Frequency of drug infection last month: 60 - times             | 0.040  | 0      |
| Frequency of drug infection last month:< 90 times              | 0.025  | 0      |
| Had sex behavior ever                                          | 0.063  | 0      |
| Numbers of sexual partner during last 3 months: One            | -0.020 | -0.024 |
| Numbers of sexual partner during last 3months: >1              | 0.092  | 0.012  |
| Used condom during the last sex Behavior                       | -0.047 | -0.002 |
| Communication with drug friends last month: 4 - 6 times/ month | -0.012 | 0      |
| Communication with drug friends last month: 1 - 6 times/ week  | 0.044  | 0      |
| Communication with drug friends last month: More than once/day | 0.068  | 0      |
| Time needed to reach the clinic (min):10 -                     | -0.019 | 0      |
| Time needed to reach the clinic (min):30 -                     | -0.051 | 0      |
| Time needed to reach the clinic (min):60 -                     | -0.085 | 0      |
| Average dose of MMT (mg): 30 -                                 | 0      | 0      |
| Average dose of MMT (mg): 60 -                                 | 0      | 0      |
| Continuous treat days: 30 -                                    | 0.000  | 0.002  |
| Continuous treat days: 60 -                                    | -0.018 | -0.001 |
| Continuous treat days: 90 -                                    | -0.100 | -0.001 |

---

**Figure S2.** The initial model of Bayesian network of factors relating to relapse of newly enrolled MMT participants who have received 6-month treatment

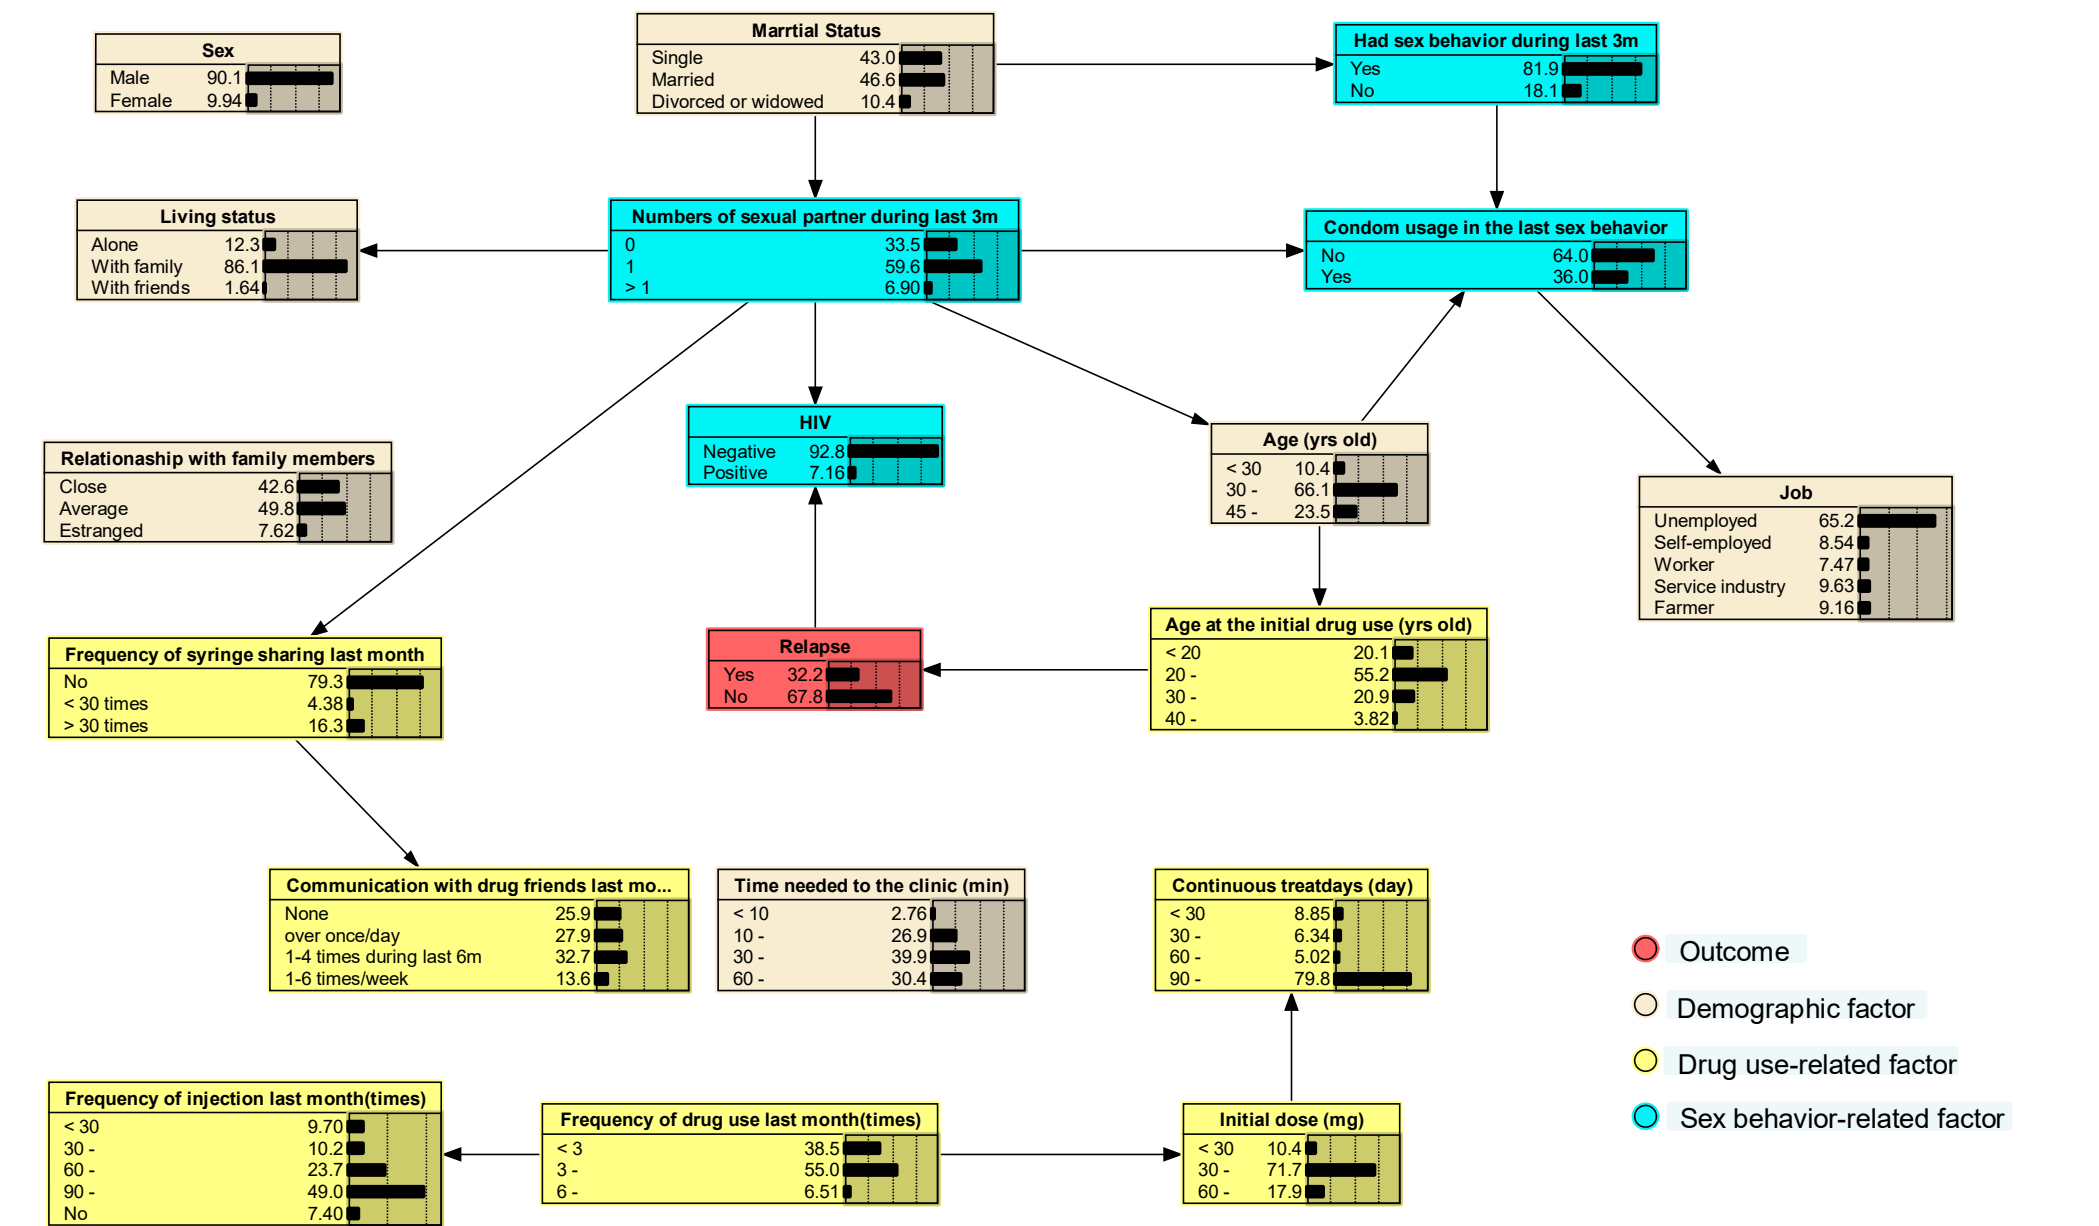

**Figure S3.** The initial model of Bayesian network of factors relating to relapse of newly enrolled MMT participants who have received 12-month treatment

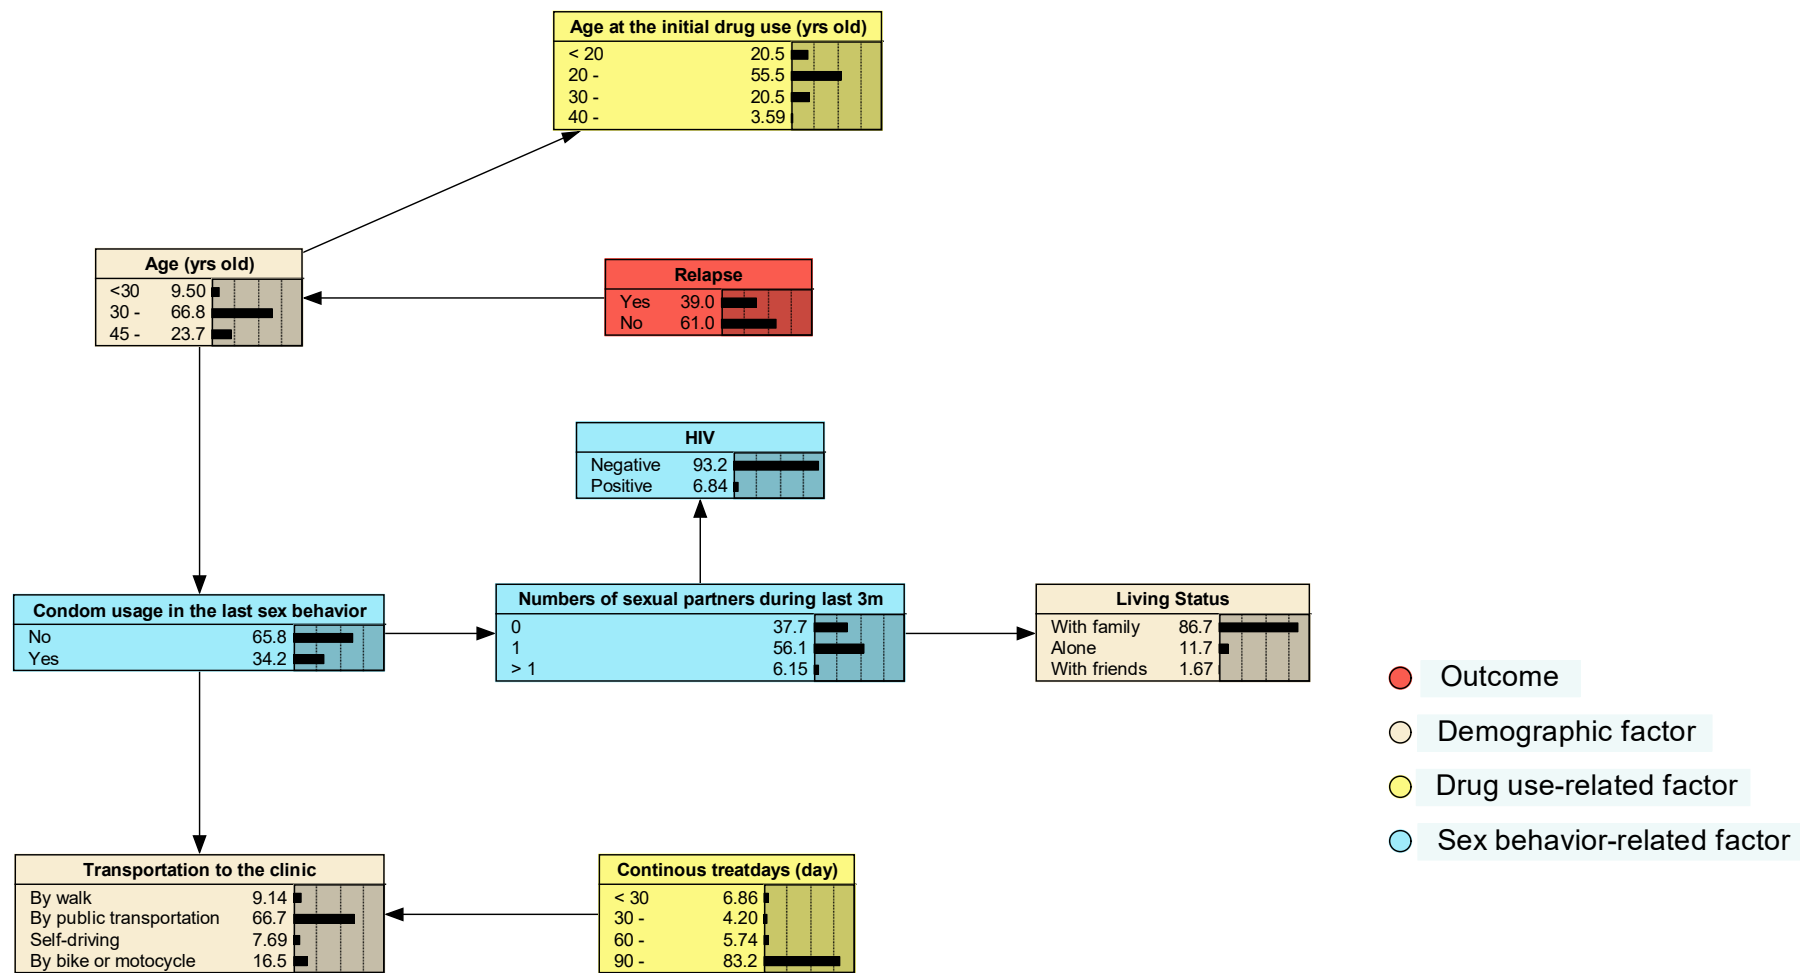



**Figure S4.** The Bayesian network of participants who have received 6-month consecutive MMT under the conditions leading to the highest relapse risk of that of 12-month consecutive MMT

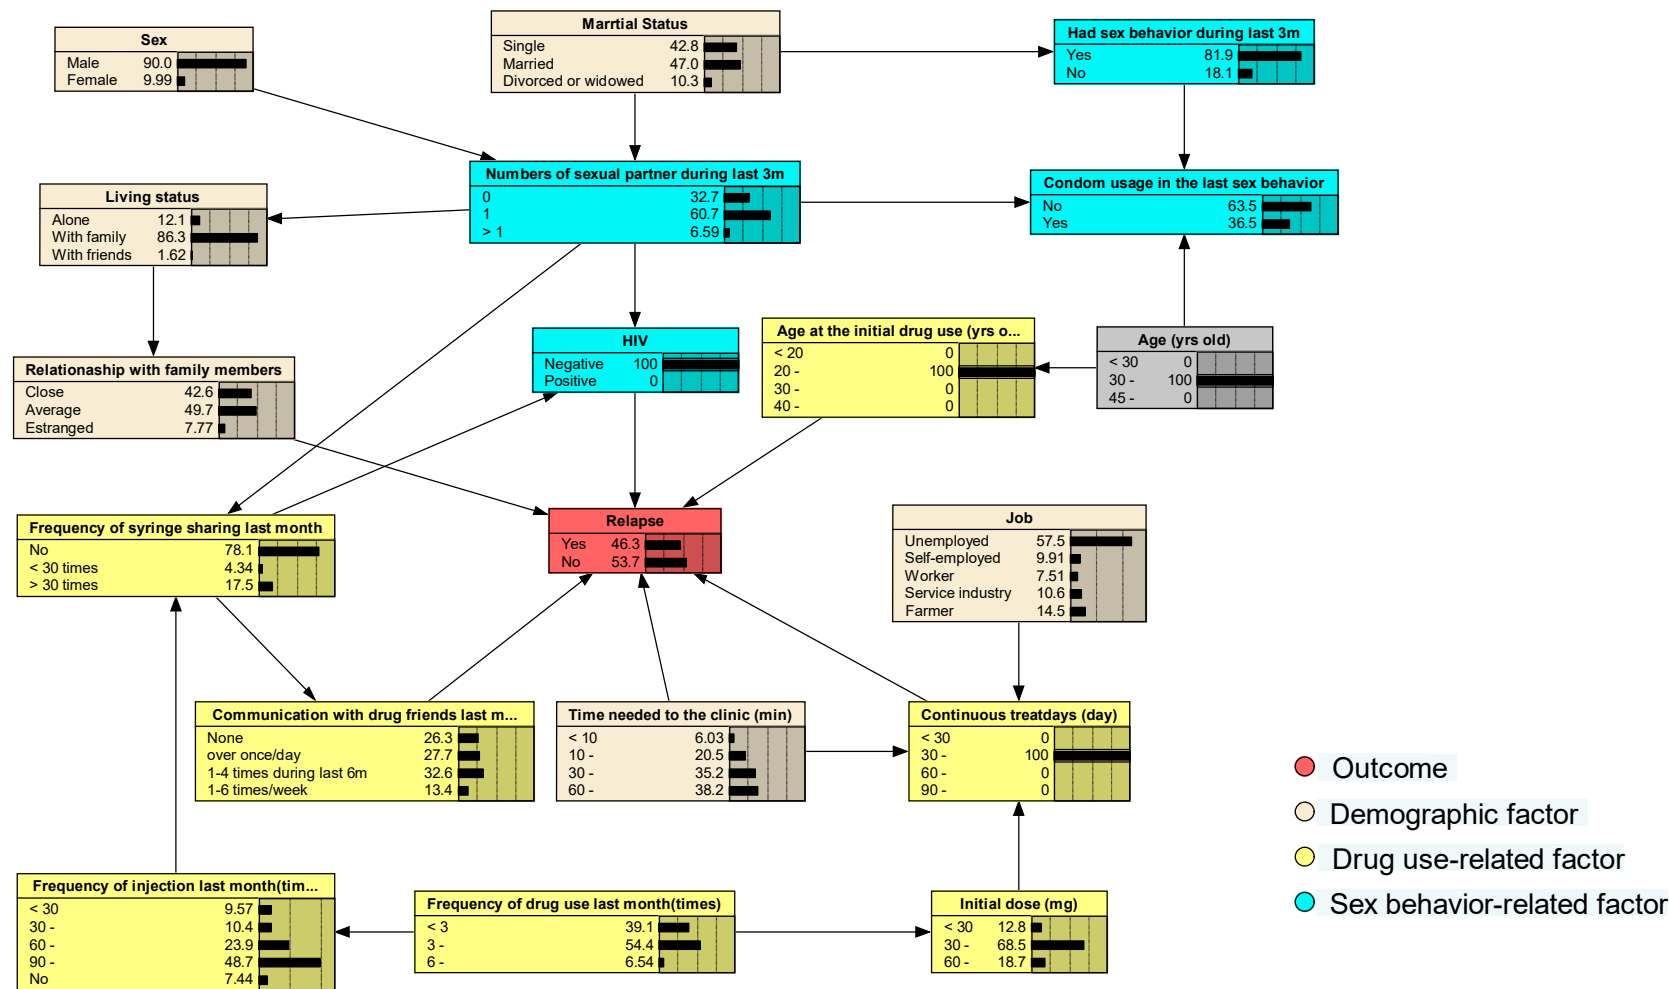

**Table S5.** Conditional probability distribution of continuous treatment days with job, initial daily dose and the time needed to the clinic as parent nodes

| Parent node                     |                           | Continuous treatment days (day, %) |         |         |      |
|---------------------------------|---------------------------|------------------------------------|---------|---------|------|
|                                 |                           | < 30                               | 30 - 60 | 60 – 90 | > 90 |
| Initial daily dose (mg)         | < 30                      | 17.0                               | 11.3    | 12.7    | 59.0 |
|                                 | 30 - 60                   | 10.0                               | 8.7     | 5.9     | 75.4 |
|                                 | > 60                      | 10.7                               | 9.6     | 11.7    | 68.0 |
| Job                             | Unemployed                | 9.1                                | 8.0     | 6.2     | 76.7 |
|                                 | Self-employed             | 15.6                               | 10.7    | 8.7     | 65.0 |
|                                 | Worker                    | 18.5                               | 9.3     | 10.4    | 61.7 |
|                                 | Service industry employee | 9.2                                | 10.0    | 10.5    | 70.3 |
|                                 | Farmer                    | 14.3                               | 14.7    | 12.1    | 58.9 |
| Time needed to the clinic (min) | < 10                      | 19.3                               | 20.0    | 15.0    | 45.7 |
|                                 | 10 -                      | 13.0                               | 7.0     | 7.5     | 72.5 |
|                                 | 30 -                      | 9.6                                | 8.1     | 7.6     | 74.7 |
|                                 | 60 -                      | 9.8                                | 11.5    | 7.2     | 71.5 |

Note\*: The probability was obtained based on the BN model of 6-month treatment

**Table S6.** The conditional probability distribution of continuous treatment days with transportation as parent nodes

| Parent node    |                          | Continuous treatment days (day, %) |         |         |      |
|----------------|--------------------------|------------------------------------|---------|---------|------|
|                |                          | < 30                               | 30 - 60 | 60 - 90 | > 90 |
| Transportation | By walk                  | 6.0                                | 2.9     | 4.4     | 86.7 |
|                | By public transportation | 6.1                                | 4.3     | 5.6     | 84.0 |
|                | By bike or motorcycle    | 8.8                                | 3.9     | 5.6     | 81.7 |
|                | Self-driving             | 10.7                               | 5.2     | 8.8     | 75.3 |

Note\*: The probability was obtained based on the BN model of 12-month treatment

**Table S7.** The model comparison of group-LASSO logistic and Bayesian networks based on different treatment durations

| Model       | Group -Lasso logistic |                     | Bayesian network    |                     |
|-------------|-----------------------|---------------------|---------------------|---------------------|
| Treatment   |                       |                     |                     |                     |
| Duration    | 6 months              | 12 months           | 6 months            | 12 months           |
| AUC         |                       |                     |                     |                     |
| (95%CI)     | 0.700(0.664 -0.737)   | 0.644(0.602 -0.685) | 0.835(0.810 -0.863) | 0.671(0.630 -0.712) |
| Sensitivity | 0.669                 | 0.515               | 0.782               | 0.679               |
| Specificity | 0.654                 | 0.690               | 0.696               | 0.574               |
